# Supplementary material for: The Effects of Ionizing Radiation on Gut Microbiota: What Can Animal Models Tell Us?—A Systematic Review
Source: MDPI journal article supplement (doi:10.3390/cimb45050249), 2023-05-02
Supplement: s1 [file s1]

**Table S1 – Risk of Bias of the analyzed interventional studies**

|                      | Selection bias      |                          |                        | Performance bias |          | Detection bias            |          | Attrition bias          | Reporting bias              | Other                 |
|----------------------|---------------------|--------------------------|------------------------|------------------|----------|---------------------------|----------|-------------------------|-----------------------------|-----------------------|
|                      | Sequence generation | Baseline characteristics | Allocation concealment | Random housing   | Blinding | Random outcome assessment | Blinding | Incomplete outcome data | Selective outcome reporting | Other sources of bias |
| Kalkeri, 2021[42]    | Unclear             | Yes                      | Unclear                | Yes              | No       | No                        | Yes      | Unclear                 | Yes                         | Yes                   |
| Tong JY, 2022[34]    | Unclear             | Yes                      | Unclear                | Yes              | No       | No                        | Yes      | Unclear                 | Yes                         | Yes                   |
| Cheema AK, 2021[35]  | Unclear             | Yes                      | Unclear                | Yes              | No       | No                        | Yes      | Unclear                 | Yes                         | Yes                   |
| Li Y, 2020 [17]      | Unclear             | Yes                      | Unclear                | Yes              | No       | No                        | Yes      | No                      | Yes                         | Yes                   |
| (Johnson, 2004) [24] | Unclear             | Yes                      | Unclear                | Yes              | No       | No                        | Yes      | Unclear                 | Yes                         | Yes                   |
| Sittipo P, 2020 [21] | Unclear             | Yes                      | Unclear                | Yes              | No       | No                        | Yes      | Unclear                 | Yes                         | Yes                   |
| Raber J, 2020 [33]   | Unclear             | Yes                      | Unclear                | Yes              | No       | No                        | Yes      | Yes                     | Unclear                     | Yes                   |
| Cai Z, 2018 [43]     | Unclear             | Yes                      | Unclear                | Yes              | No       | No                        | Yes      | Yes                     | Yes                         | Yes                   |
| Rentea RM, 2016 [36] | Unclear             | Yes                      | Unclear                | Yes              | No       | No                        | Yes      | Unclear                 | Yes                         | Yes                   |
| Lam Vy, 2012 [37]    | Unclear             | Yes                      | Unclear                | Yes              | No       | No                        | Yes      | Yes                     | Yes                         | Yes                   |
| Cui M,               | Unclear             | Yes                      | Unclear                | Yes              | No       | No                        | Yes      | No                      | Yes                         | Yes                   |

|                          |         |     |         |     |    |    |     |         |     |     |
|--------------------------|---------|-----|---------|-----|----|----|-----|---------|-----|-----|
| 2017 [20]                |         |     |         |     |    |    |     |         |     |     |
| Carbonero F, 2018 [41]   | Unclear | Yes | Unclear | Yes | No | No | Yes | Unclear | Yes | Yes |
| (Carbonero F, 2018) [40] | Unclear | Yes | Unclear | Yes | No | No | Yes | Unclear | Yes | Yes |
| (Casero D, 2017)[26]     | Unclear | Yes | Unclear | Yes | No | No | Yes | Unclear | Yes | Yes |
| Ben Ami, 2020 [44]       | Unclear | Yes | Unclear | Yes | No | No | Yes | Unclear | Yes | Yes |
| Wang M, 2020 [28]        | Unclear | Yes | Unclear | Yes | No | No | Yes | Unclear | Yes | Yes |
| Wang W, 2020 [30]        | Unclear | No  | Unclear | Yes | No | No | Yes | Unclear | Yes | Yes |
| Zhao Y, 2019) [31]       | Unclear | Yes | Unclear | Yes | No | No | Yes | Unclear | Yes | Yes |
| Zhao Z, 2020 [29]        | Unclear | Yes | Unclear | Yes | No | No | Yes | Unclear | Yes | Yes |
| Yamanouchi K, 2019 [18]  | Unclear | Yes | Unclear | Yes | No | No | Yes | Unclear | Yes | Yes |
| Woruba DN, 2019 [45]     | Unclear | Yes | Unclear | Yes | No | No | Yes | Unclear | Yes | Yes |
| Goudarzi M, 2016 [19]    | Unclear | Yes | Unclear | Yes | No | No | Yes | Unclear | Yes | Yes |
| Kim YS, 2015 [27]        | Unclear | Yes | Unclear | Yes | No | No | Yes | Unclear | Yes | Yes |

|                             |         |     |         |     |    |    |     |         |     |     |
|-----------------------------|---------|-----|---------|-----|----|----|-----|---------|-----|-----|
| Gerassy-Vainberg, 2018 [22] | Unclear | Yes | Unclear | Yes | No | No | Yes | Unclear | Yes | Yes |
| Liu X, 2019 [23]            | Unclear | Yes | Unclear | Yes | No | No | Yes | Yes     | Yes | Yes |
| Lu L, 2020 [25]             | Unclear | Yes | Unclear | Yes | No | No | Yes | Yes     | Yes | Yes |
